# Supplementary material for: Regression tree construction by bootstrap: Model search for DRG-systems applied to Austrian health-data
Source: Springer Nature journal article supplement (doi:10.1186/1472-6947-10-9), 2010-02-03
Supplement: 12911_2009_310_MOESM2_ESM.pdf [file 12911_2009_310_MOESM2_ESM.pdf]

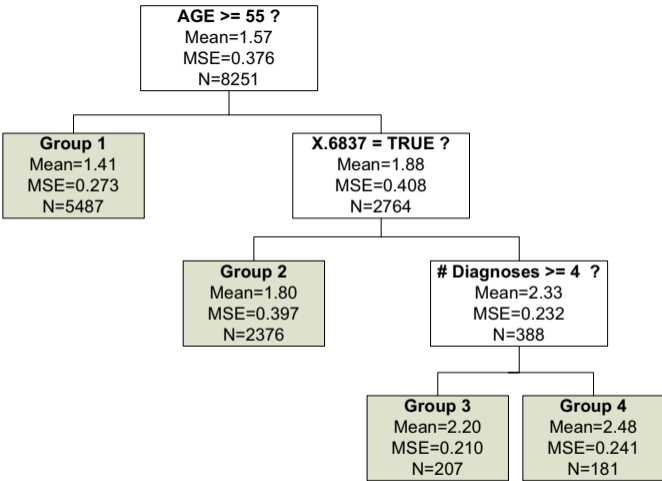

(a)

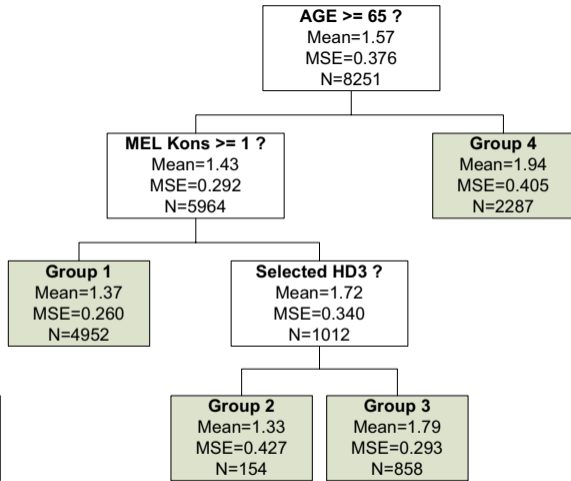

(b)
